# Supplementary material for: Monovalent Salt and pH-Induced Gelation of Oxidised Cellulose Nanofibrils and Starch Networks: Combining Rheology and Small-Angle X-ray Scattering
Source: MDPI journal article supplement (doi:10.3390/polym13060951), 2021-03-19
Supplement: s1 [file s1]

# Electronic supplementary information (ESI)

## **Monovalent salt and pH-induced gelation of oxidised cellulose nanofibrils and starch networks: combining rheology and small-angle X-ray scattering**

Kazi M. Zakir Hossain<sup>a</sup>, Vincenzo Calabrese<sup>a</sup>, Marcelo A. da Silva<sup>a</sup>, Saffron J. Bryant<sup>a</sup>, Julien Schmitt<sup>at</sup>, Jennifer H. Ahn-Jarvis<sup>b</sup>, Frederick J. Warren<sup>b</sup>, Yaroslav Z. Khimyak<sup>c</sup>, Janet L. Scott<sup>ad</sup>, and Karen J. Edler<sup>ad\*</sup>

<sup>a</sup>Department of Chemistry, University of Bath, Claverton Down, Bath, BA2 7AY, UK

<sup>b</sup>Food Innovation and Health, Quadram Institute Bioscience, Norwich Research Park, Norwich, UK, NR4 7UQ

<sup>c</sup>School of Pharmacy, University of East Anglia, Norwich NR4 7TJ, UK

<sup>d</sup>Centre for Sustainable Chemical Technologies, University of Bath, Claverton Down, Bath, BA2 7AY, UK

<sup>t</sup>current address: LSFC - Laboratoire de Synthèse et Fonctionnalisation des Céramiques, UMR 3080 CNRS / Saint-Gobain CREE, Saint-Gobain Research Provence, 550 avenue Alphonse Jauffret, Cavaillon, France

\*Corresponding author: K.Edler@bath.ac.uk

a)

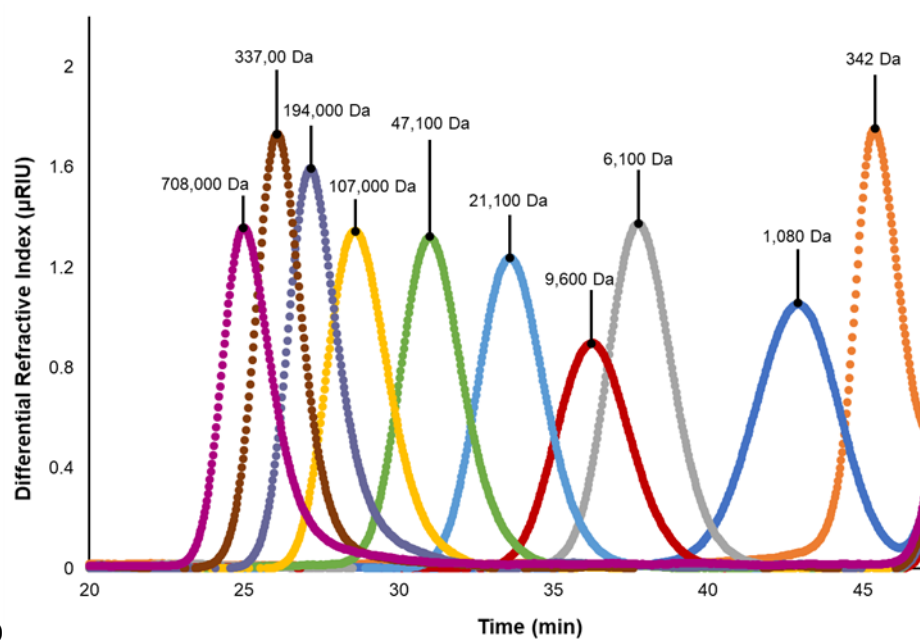

b)

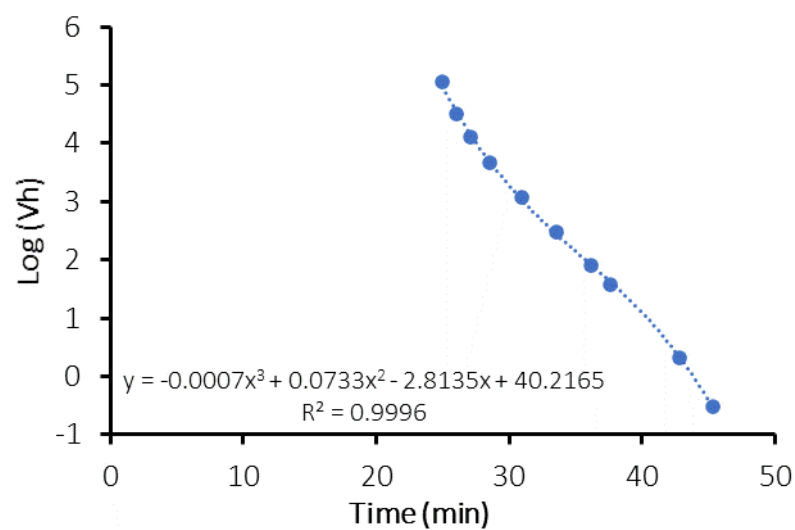

**Figure S1:** a) Elution profiles of pullulan standards and b) standard curve obtained from the elution profile of pullulan standards.

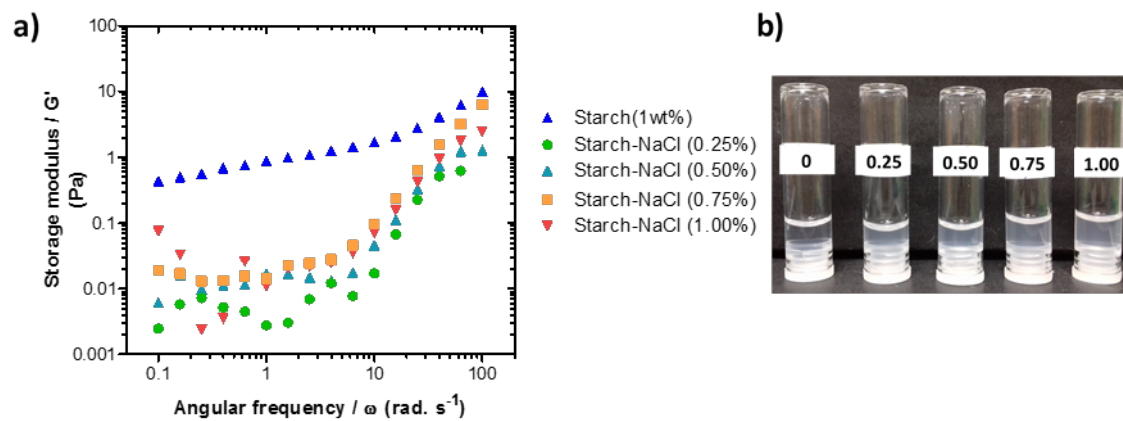

**Figure S2:** a) Frequency sweep curves and b) photographs of the starch (1 wt%)/NaCl (0, 0.25, 0.5, 0.75 or 1 wt%) hydrogels.

### Gels prepared at pH 3.4

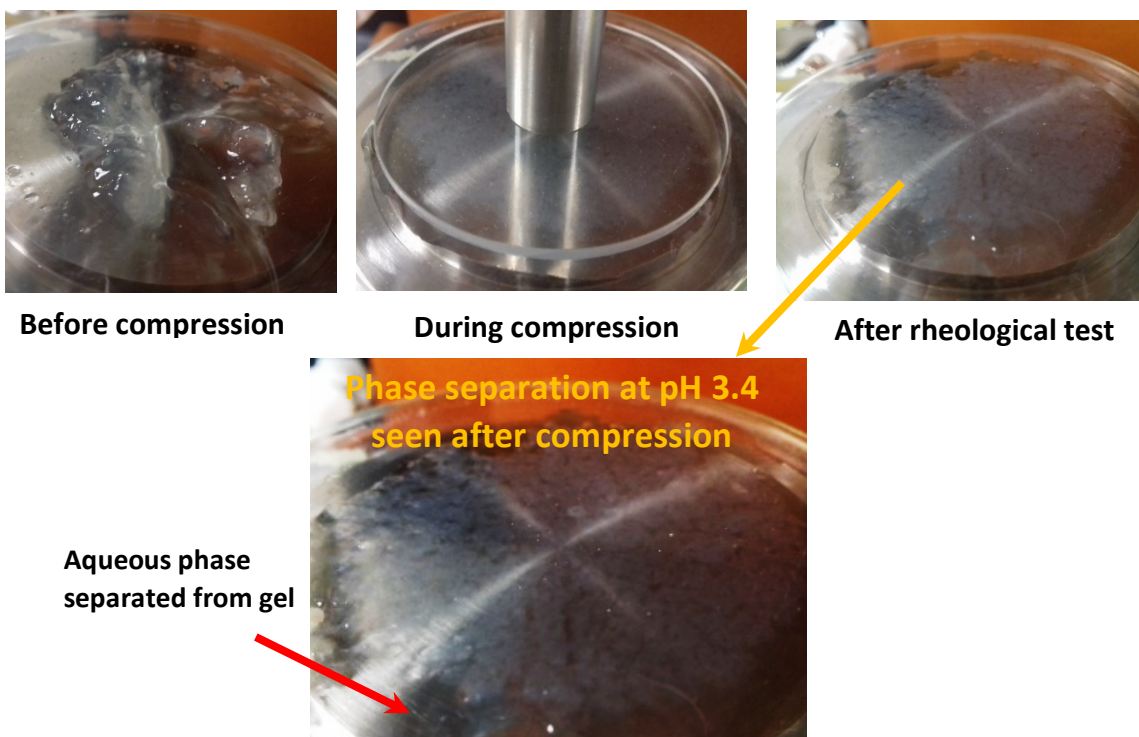

### Gels prepared at pH 4.0

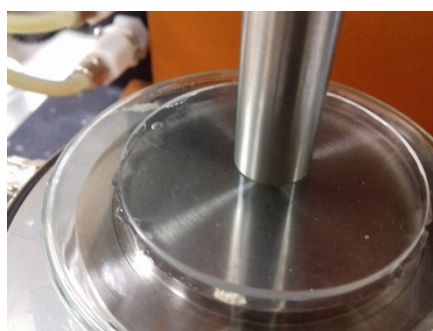

After rheological test (stable gel)

**Figure S3:** Photographs show the phase separation of OCNF (1 wt%) hydrogels after rheological test produced at pH 3.4 (top) and no phase separation for the gels produced at pH 4.0 (bottom). Here, a 80 mm glass plate was used to visualise the gels physical properties during rheological tests.

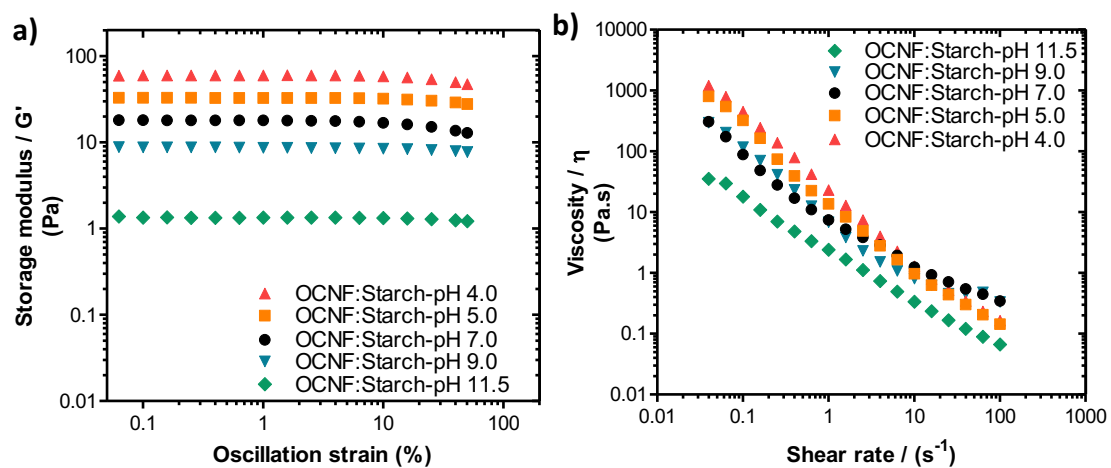

**Figure S4:** a) amplitude sweeps, and b) shear flow curves of OCNF:Starch (1:1 wt%) hydrogels made at various pH conditions (4, 5, 7, 9, 11.5).

**Table S1:** The parameters obtained by fitting of SAXS data via rigid and flexible elliptical cylinder models. The length of the OCNF was fixed at 1600 Å based on the average length obtained via the TEM image analysis,<sup>26</sup> except for the OCNF(1%)-NaCl(1%) gel, where a longer length (4000 Å) was used to fit the experimental data. This apparent increase in length might be associated with the salt-induced (at higher concentration, 1%) longitudinally assembled fibres.

SLD (scattering length density) for cellulose:  $13.5 \times 10^{-6} \text{ Å}^{-2}$

SLD solvent:  $9.5 \times 10^{-6} \text{ Å}^{-2}$

|                     | Model                        | Radius-minor (Å) | Axis ratio | Kuhn length (Å) | Length (Å) |
|---------------------|------------------------------|------------------|------------|-----------------|------------|
| OCNF(1%)            | Rigid elliptical cylinder    | 11±2             | 4.8        | -               | 1600       |
| OCNF(1%)-0.25% NaCl | Rigid elliptical cylinder    | 11.5±2           | 5.2        | -               | 1600       |
| OCNF(1%)-0.50% NaCl | Flexible elliptical cylinder | 11.8±2           | 5.0        | 600             | 1600       |
| OCNF(1%)-1.00% NaCl | Flexible elliptical cylinder | 12.5±2           | 5.0        | 400             | 4000       |
| OCNF(1%)-pH 4.0     | Rigid elliptical cylinder    | 11.5±2           | 4.8        | -               | 1600       |
| OCNF(1%)-pH 5.0     | Rigid elliptical cylinder    | 11.5±2           | 4.8        | -               | 1600       |
| OCNF(1%)-pH 9.0     | Rigid elliptical cylinder    | 11.5±2           | 4.5        | -               | 1600       |
| OCNF(1%)-pH 11.5    | Rigid elliptical cylinder    | 12.5±2           | 4.5        | -               | 1600       |
